# Supplementary material for: Reduced GABAergic transmission in the ventrobasal thalamus contributes to thermal hyperalgesia in chronic inflammatory pain
Source: PubMed Central journal article supplement (PMC5288727; doi:10.1038/srep41439), 2017-02-02
Supplement: srep41439-s1.pdf [file srep41439-s1.pdf]

## **Supplementary Figures**

### **Reduced GABAergic transmission in the ventrobasal thalamus contributes to thermal hyperalgesia in chronic inflammatory pain**

Chan Zhang, Rong-Xiang Chen, Yu Zhang, Jie Wang, Feng-Yu Liu, Jie Cai, Fei-Fei  
Liao, Fu-Qiang Xu, Ming Yi, You Wan

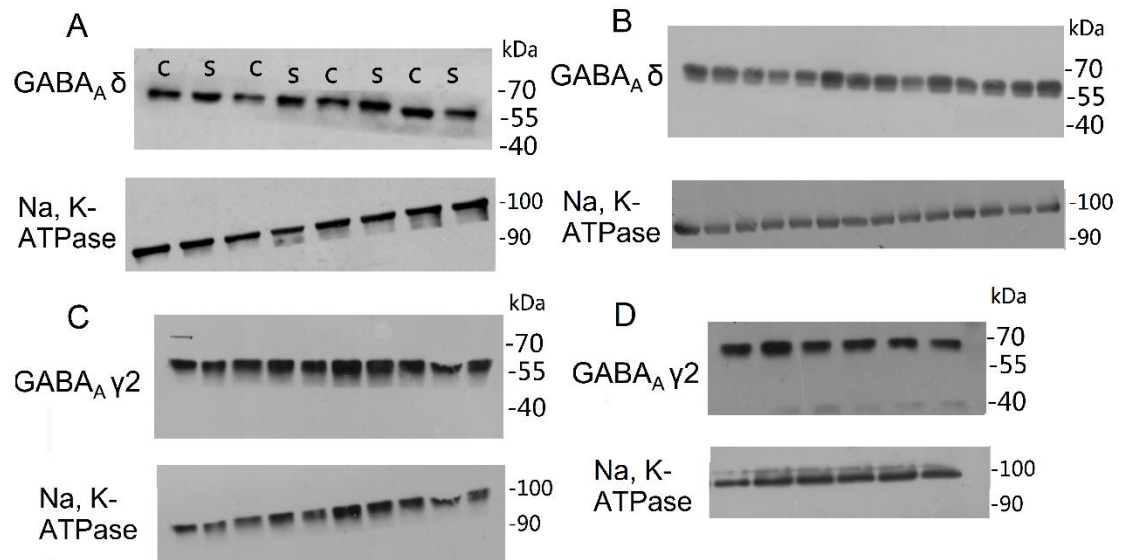

**Supplementary Figure S1. Full-length Images of Western Blot of**

**GABA<sub>A</sub>R δ and γ2 Subunits Presented in Fig. 4**

(A) and (B) Western blot of thalamic GABA<sub>A</sub>R δ subunits in CFA-1D and CFA-7D. (C) and (D) Western blot of thalamic GABA<sub>A</sub>R γ2 subunits in CFA-1D and CFA-7D groups. C: CFA group; S: Sham group.

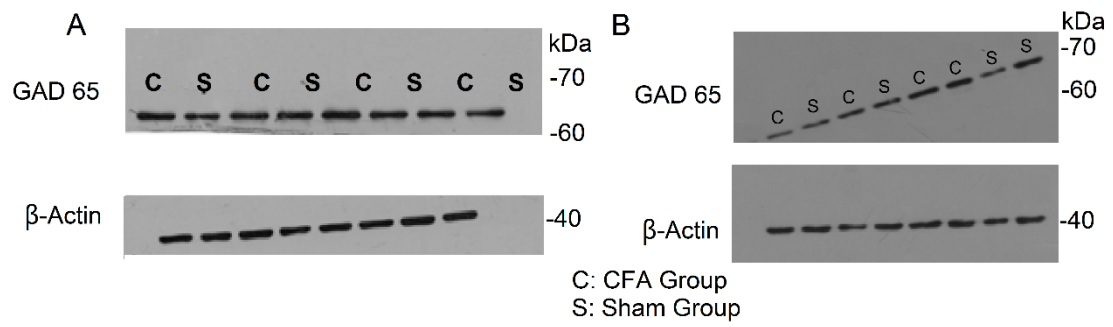

**Supplementary Figure S2. Full-length Images of the Western Blot of GAD65 Presented in Fig. 5**

(A) Western blot of thalamic GAD65 in acute pain (CFA-1D). (B) Western blot of thalamic GAD65 in chronic pain (CFA-7D). C: CFA group; S: Sham group.
